# Supplementary material for: Dispensing of antibiotics without prescription and associated factors in drug retail outlets of Eritrea: A simulated client method
Source: PubMed Central journal article supplement (PMC6980490; doi:10.1371/journal.pone.0228013), 2020-01-24
Supplement: pone.0228013.s001.pdf [file pone.0228013.s001.pdf]

**Data recording form for the sales of antibiotics without prescription**

| <b>Section A: Background Information</b> |                                                                          |                                                                                                                                                                              |
|------------------------------------------|--------------------------------------------------------------------------|------------------------------------------------------------------------------------------------------------------------------------------------------------------------------|
| <b>No.</b>                               | <b>Indicators</b>                                                        | <b>Coding categories</b>                                                                                                                                                     |
| 101                                      | Code of the pharmacy outlet                                              | <input type="text"/> <input type="text"/>                                                                                                                                    |
| 102                                      | Type of the pharmacy outlet                                              | Governmental chain pharmacy..... 1<br>Private community pharmacy..... 2<br>Private drug shop..... 3                                                                          |
| 103                                      | Zonal location                                                           | Maekel ..... 1<br>Northern Red Sea ..... 2<br>Debub ..... 3<br>Anseba ..... 4<br>Gash Barka ..... 5<br>Southern Red sea ..... 6                                              |
| 104                                      | Subzone name                                                             | _____                                                                                                                                                                        |
| 105                                      | Sex of the professional                                                  | Male..... 1<br>Female ..... 2                                                                                                                                                |
| 106                                      | Estimated age group (in years)                                           | Below 30 years ..... 1<br>30 – 50 years ..... 2<br>Above 50 years..... 3                                                                                                     |
| 107                                      | Does the professional license photo matched with the pharmacy attendant? | Yes..... 1<br>No ..... 2<br>Not sure ..... 3<br>Not found..... 4                                                                                                             |
| 108                                      | Actual age (in years)                                                    | <input type="text"/> <input type="text"/>                                                                                                                                    |
| 109                                      | Title of the professional                                                | Pharmacist ..... 1<br>Pharmacy technician ..... 2<br>Nursing Degree ..... 3<br>Nursing Diploma ..... 4<br>Health assistant..... 5<br>Other ( <i>please specify</i> ) _____ 6 |
| 110                                      | Year of experience                                                       | <input type="text"/> <input type="text"/>                                                                                                                                    |

| Section B: Information related to Antibiotic dispensing |                                                                                |                                                                                                                                                                                                                                    |              |
|---------------------------------------------------------|--------------------------------------------------------------------------------|------------------------------------------------------------------------------------------------------------------------------------------------------------------------------------------------------------------------------------|--------------|
| No.                                                     | Indicators                                                                     | Coding categories                                                                                                                                                                                                                  | Skip         |
| 201                                                     | Type of the clinical scenario                                                  | Acute watery diarrhea ..... 1<br>Uncomplicated UTI..... 2                                                                                                                                                                          |              |
| 202                                                     | Was an antibiotic dispensed?                                                   | Yes..... 1<br>No ..... 2                                                                                                                                                                                                           | → 205        |
| 203                                                     | At which level of demand was the antibiotic dispensed?                         | Demand 1 ..... 1<br>Demand 2 ..... 2<br>Demand 3 ..... 3                                                                                                                                                                           |              |
| 204                                                     | Name of the antibiotic(s) dispensed<br><i>(Multiple answers are possible)</i>  | Ciprofloxacin..... A<br>Co-trimoxazole..... B<br>Metronidazole ..... C<br>Amoxicillin ..... D<br>Doxycycline ..... E<br>Other <i>(please specify)</i> _____ X                                                                      | End of entry |
| 205                                                     | Reason for not selling an antibiotic<br><i>(Multiple answers are possible)</i> | Administrative issues ..... A<br>Referral to health facility..... B<br>Illness doesn't require an antibiotic C<br>Fear of complications ..... D<br>Unavailability of an antibiotic..... E<br>Other <i>(please specify)</i> _____ X |              |
| 206                                                     | Name of the alternative medication dispensed in place of an antibiotic, if any | _____                                                                                                                                                                                                                              |              |

Data Collector Code

Date \_\_\_\_\_

**Comment Section**
